# Supplementary material for: Genetic and physical interactions reveal overlapping and distinct contributions to meiotic double-strand break formation in C. elegans
Source: eLife. 2026 Mar 25;13:RP96458. doi: 10.7554/eLife.96458 (PMC13016608; doi:10.7554/eLife.96458)
Supplement: Figure 1—source data 5. [file elife-96458-fig1-data5.xlsx]

## Sheet: him-17ok
genotype	him-17(ok)							Ppie-1::him-5::GFP; him-17											Phim-5::him-5::GFP; him-17
	No.	egg	progeny	male	hatching rate	male rate		No.	egg	progeny	male	hatching rate	male rate						No.	progeny	male	male rate
	1	135	11	4	0.0814815	0.363636		1	33	34	0	1.0303	0						1	46	13	0.282609
	2	125	14	7	0.112	0.5		2	25	18	1	0.72	0.0555556						2	43	11	0.255814
	3	125	5	1	0.04	0.2		3	135	84	5	0.622222	0.0595238						3	36	11	0.305556
	4	20	0	0	0	/		4	70	39	5	0.557143	0.128205						5	75	23	0.306667
	5	29	0	0	0	/		5	78	82	2	1.05128	0.0243902						6	48	20	0.416667
	6	113	1	0	0.00884956	0		6	86	64	4	0.744186	0.0625						7	34	8	0.235294
	7	82	0	0	0	/		7	31	24	0	0.774194	0						8	53	6	0.113208
	8	154	1	0	0.00649351	0		8	44	31	7	0.704545	0.225806						9	66	13	0.19697
	9	108	12	3	0.111111	0.25		9	148	72	10	0.486486	0.138889						10	162	18	0.111111
	10	116	8	2	0.0689655	0.25		10	78	39	1	0.5	0.025641						11	19	6	0.315789
	11	113	4	2	0.0353982	0.5		11	77	65	4	0.844156	0.0615385						12	138	41	0.297101
	12	118	14	5	0.118644	0.357143		12	186	64	5	0.344086	0.078125						13	75	10	0.133333
	13	91	10	3	0.10989	0.3		13	85	23	4	0.270588	0.173913						14	49	11	0.22449
	14	178	5	2	0.0280899	0.4		14	74	43	2	0.581081	0.0465116						15	153	19	0.124183
	15	95	2	1	0.0210526	0.5		15	114	46	3	0.403509	0.0652174						16	39	10	0.25641
	16	135	22	5	0.162963	0.227273		16	108	98	5	0.907407	0.0510204						17	43	14	0.325581
	17	123	0	0	0	/		17	107	100	4	0.934579	0.04						18	84	19	0.22619
	18	20	1	0	0.05	0		18	112	77	2	0.6875	0.025974						19	45	17	0.377778
					0.0530522	0.349823						0.675737	0.0701562						Average			0.250264
Day 1	No.	egg	progeny	male			Day 1	No.	egg	progeny	male								No.	progeny	male
12.22	1	36	6	2			12.22	1	6	4	0							Day 1	1	6	1
	2	2	1	0				2	9	7	0							2017-02-19	2	0	0
	3	11	1	1				3	4	3	2								3	0	0
	4	0	0	0				4	11	4	0								4	0	0
	5	10	0	0				5	5	4	0								5	7	2
	6	19	0	0				6	11	9	1								6	2	1
	7	4	0	0				7	8	5	0								7	1	1
	8	17	0	0				8	7	6	0								8	0	0
	9	15	1	1				9	13	8	2								9	4	1
	10	21	1	0				10	13	8	1								10	13	2
	11	22	1	0				11	8	6	1								11	0	0
	12	22	1	0				12	23	15	2								12	2	0
	13	14	0	0				13	17	8	0								13	2	1
	14	4	1	0				14	23	15	0								14	0	0
	15	7	0	0				15	9	4	1								15	16	1
	16	0	0	0				16	16	13	2								16	0	0
	17	12	0	0				17	11	9	0								17	5	2
	18	0	0	0				18	7	5	0								18	12	4
																			19	0	0
Day 2	No.	egg	progeny	male			Day 2	No.	egg	progeny	male
12.23	1	89	5	2			12.23	1	27	26	0								No.	progeny	male
	2	67	13	7				2	12	5	1							Day 2	1	35	11
	3	74	2	0				3	56	34	1							2017-02-20	2	35	8
	4	18	0	0				4	46	28	3								3	27	6
	5	17	0	0				5	37	40	1								4	0	0	dead
	6	66	1	0				6	52	45	2								5	42	14
	7	38	0	0				7	19	18	0								6	33	13
	8	59	1	0				8	28	21	5								7	22	3
	9	70	10	2				9	50	31	1								8	48	6
	10	72	6	2				10	34	19	0								9	62	12
	11	78	3	2				11	54	50	3								10	109	8
	12	81	12	5				12	58	18	2								11	6	2
	13	74	10	3				13	68	15	4								12	64	20
	14	70	4	2				14	51	24	2								13	56	8
	15	71	2	1				15	62	33	1								14	8	0
	16	75	19	4				16	75	68	3								15	90	8
	17	81	0	0				17	60	58	2								16	29	7
	18	20	1	0				18	52	49	0								17	31	9
																			18	41	14
Day 3	No.	egg	progeny	male			Day 3	No.	egg	progeny	male								19	27	13
12.24	1	10	0	0			12.24	1	0	3	0
	2	50	0	0				2	4	6	0								No.	progeny	male
	3	36	2	0				3	67	36	2							Day 3	1	4	1
	4	0	0	0				4	12	7	2							2017-02-21	2	8	3
	5	2	0	0				5	35	33	1								3	9	5
	6	26	0	0				6	18	10	1								4	0	0
	7	31	0	0				7	4	0	0								5	24	7
	8	53	0	0				8	7	3	1								6	13	6
	9	23	1	0				9	80	31	7								7	11	4
	10	19	1	0				10	30	12	0								8	5	0
	11	12	0	0				11	15	9	0								9	0	0
	12	13	1	0				12	82	23	1								10	39	8
	13	3	0	0				13											11	9	3
	14	75	0	0				14	0	3	0								12	61	19
	15	17	0	0				15	43	9	1								13	15	1
	16	55	3	1				16	17	16	0								14	16	6
	17	29	0	0				17	35	30	2								15	45	10
	18	0	0	0				18	46	18	2								16	10	3
																			17	7	3
Day 4	No.	egg	progeny	male			Day 4	No.	egg	progeny	male								18	25	1
12.25	1	0	0	0			12.25	1	0	1	0								19	18	4
	2	6	0	0				2
	3	4	0	0				3	8	11	0								No.	progeny	male
	4	2	0	0				4	1	0	0							Day 4	1	1	0
	5	0	0	0				5	1	5	0							2017-02-22	2	0	0
	6	2	0	0				6	5	0	0								3	0	0
	7	9	0	0				7	0	1	0								4	0	0
	8	25	0	0				8	2	1	1								5	2	0
	9	0	0	0				9	5	2	0								6	0	0
	10	4	0	0				10	1	0	0								7	0	0
	11	1	0	0				11	0	0	0								8	0	0
	12	2	0	0				12	23	8	0								9	0	0
	13	0	0	0				13											10	1	0
	14	29	0	0				14	0	1	0								11	4	1
	15	0	0	0				15	0	0	0								12	11	2
	16	5	0	0				16	0	1	0								13	2	0
	17	1	0	0				17	1	3	0								14	25	5
	18	0	0	0				18	7	5	0								15	2	0
																			16	0	0
																			17	0	0
																			18	6	0
																			19	0	0
