# Supplementary material for: Genetic and physical interactions reveal overlapping and distinct contributions to meiotic double-strand break formation in C. elegans
Source: eLife. 2026 Mar 25;13:RP96458. doi: 10.7554/eLife.96458 (PMC13016608; doi:10.7554/eLife.96458)
Supplement: Figure 2—source data 5. [file elife-96458-fig2-data5.xlsx]

## Sheet: dsb-1
worm	DAPI count
1.a.1	11
2.a.2	11
5.a.2	11						11	12
5.a.3	11						8	29
1.2.a.1	11
1.5.b.2	11
1.6.a	11
1.6.b	11
1.a.2	12
1.b.1	12
a.b.2	12
2.a.1	12
2.b.1	12
3.a.1	12
3.b.1.	12
3.b.2	12
4.a.1	12
4.a.2	12
4.b.1	12
4.b.2	12
5.a.1	12
1.1.a.1	12
1.1.a.2	12
1.1.b.1	12
1.1.b.2	12
1.2.b.1	12
1.2.b.2	12
1.3.a.1	12
1.3.a.2	12
1.3.b.1	12
1.3.b.2	12
1.4.a.1	12
1.4.b.1	12
1.4.b.2	12
1.5.a.1	12
1.5.a.2	12
1.5.b.1	12

## Sheet: dsb-1; eaIs15
worm	DAPI count
1.a.1	12
1.a.2	12			genotype	6	7	8	9	10	11	12	n
1.b.1.	11			N2	97.561	2.43902	0	0	0	0	0	41
2.a.1	11			dsb-1	0	0	0	0	0	21.6216	78.3784	37
2.a.2	12			pie-1p::him-5, dsb-1	0	0	0	0	0	38.7097	61.2903	31
2.b.1	12			dsb-2	0	0	5	10	20	20	45	48
3.a.1	12			pie-1p::him-5, dsb-2	4.7619	4.7619	9.52381	4.7619	33.3333	9.52381	33.3333	49
3.a.2	12															40.59
3.b.1	11															0.41
3.b.2	12
4.a.1	11
4.a.2	11															97.561
4.b.1	12
4.b.2	12
5.a.1	12
5.b.1	11
5.b.2	12
6.a.1	12
6.a.2	12
6.b.1	11
7.a.1	12
7.a.2	11
7.b.1	12
7.b.2	12
8.a.1	11
8.a.2	11
8.b.1	12
8.b.2	12
9.a.1	11
9.a.2	11
9.b.1	12

## Sheet: dsb-1; eaIs15 round II
worm	DAPI count
1.a	12
1.a.2	11			11	12	n
1.b	12			40.8163	59.1837	49
1.b.2	12				100
2.a	11
2.a.2	12
2.b	12
3.a	11
3.a.2	12
3.b	12
4.a	11				6	7	8	9	10	11	12	n
4.a.2	11			N2	99	1	0	0	0	0	0	41
4.b	12			dsb-1	0	0	0	0	0	21.6216	78.3784	37
4.b.2	11			pie-1p::him-5, dsb-1	0	0	0	0	0	40.8163	59.1837	49
5.a	11			dsb-2	0	0	5	10	20	20	45	48
5.b	11			pie-1p::him-5, dsb-2	4.7619	4.7619	9.52381	4.7619	33.3333	9.52381	33.3333	49
5.b.2	12
6.a	12
6.a.2	11
6.b	11
7.a	11
7.a.2	11
7.b	11
7.b.2	12
8.a	12
9.a	11
9.a.2	12
9.b	12
9.b.2	12
1.1.a	11
1.1.a.2	11
1.2.a.	12
1.2.a.2	12
1.3.a	11
1.3.a.2	11
1.3.b	12
1.3.b.2	12
1.4.a	12
1.4.a.2	11
1.5.a	12
1.5.a.2	11
1.6.a	12
1.6.b	12
1.6.b.2	12
1.7.a	12
1.7.a.2	12
1.7.b	12
1.8.b.	12
1.8.b.2	12
