# Supplementary material for: Genetic and physical interactions reveal overlapping and distinct contributions to meiotic double-strand break formation in C. elegans
Source: eLife. 2026 Mar 25;13:RP96458. doi: 10.7554/eLife.96458 (PMC13016608; doi:10.7554/eLife.96458)
Supplement: Figure 2—source data 6. [file elife-96458-fig2-data6.xlsx]

## Sheet: dsb-2 males
Genotype	dsb-2(me96)
		Date	Day	No.	males	hermaphrodites
		8.25	1	1	0	34
				2	2	28
				3	1	25
				4	0	23
				5	0	28
				6	0	28
				7	1	30
				8	0	20
				9	2	41
				10	5	42
		Date	Day	No.	males	hermaphrodites
		8.26	2	1	2	46
				2	5	56
				3	4	61
				4	1	50
				5	8	55
				6	10	52
				7	7	48
				8	6	59
				9	3	32
				10	2	45
		Date	Day	No.	males	hermaphrodites
		8.27	3	1	1	3
				2	0	0
				3	0	2
				4	1	2
				5	1	12
				6	3	10
				7	0	5
				8	1	5
				9	1	4
				10	0	0
		Date	Day	No.	males	hermaphrodites
		8.28	4	1	0	0
				2	0	0
				3	0	0
				4	0	0
				5	0	0
				6	0	12
				7	0	1
				8	0	0
				9	0	0
				10	0	0
		Date	Day	No.	males	hermaphrodites
		8.29	5	1	0	2
				2	0	0
				3	0	0
				4	0	4
				5	0	1
				6	0	1
				7	0	0
				8	0	0
				9	0	0
				10	0	0
			Add up	No.	males	hermaphrodites	total	male/total
				1	3	85	88	0.0340909
				2	7	84	91	0.0769231
				3	5	88	93	0.0537634
				4	2	79	81	0.0246914
				5	9	96	105	0.0857143
				6	13	103	116	0.112069
				7	8	84	92	0.0869565
				8	7	84	91	0.0769231
				9	6	77	83	0.0722892
				10	7	87	94	0.0744681
								0.0697889
Genotype	h5p::him-5(ok)::GFP;dsb-2(me96)								Genotype	dsb-2;Ppie-1::him-5::GFP
		Date	Day	No.	males	hermaphrodites				Date	Day	No.	males	hermaphrodites
		9.16~9.12	1	1	1	52				9.16~9.12	1	1	1	33
				2	0	32						2	1	28
				3	1	18						3	0	27
				4	0	33						4	1	30
				5	0	53						5	0	28
				6	0	46						6	1	38
				7	3	35						7	1	41
				8	0	42						8	1	22
				9	0	30						9	0	44
				10	0	25						10	1	32
		Date	Day	No.	males	hermaphrodites				Date	Day	No.	males	hermaphrodites
		9.17~9.13	2	1	5	29				9.17~9.13	2	1	7	32
				2	14	54						2	4	50
				3	4	46						3	3	39
				4	1	30						4	5	49
				5	2	59						5	4	46
				6	4	66						6	2	40
				7	7	33						7	5	32
				8	2	57						8	4	31
				9	0	73						9	1	38
				10	2	26						10	6	33
		Date	Day	No.	males	hermaphrodites				Date	Day	No.	males	hermaphrodites
		9.18~9.14	3	1	2	9				9.18~9.14	3	1	1	2
				2	0	14						2	1	5
				3	0	0						3	0	2
				4	1	8						4	1	1
				5	1	7						5	0	1
				6	0	3						6	1	2
				7	1	7						7	1	2
				8	1	14						8	1	6
				9	0	8						9	1	3
				10	1	8						10	2	5
		Date	Day	No.	males	hermaphrodites				Date	Day	No.	males	hermaphrodites
		9.18~9.15	4	1	0	2				9.18~9.15	4	1	0	0
				2	0	0						2	1	0
				3	0	0						3	1	1
				4	0	2						4	0	0
				5	0	2						5	0	2
				6	0	0						6	0	0
				7	0	0						7	0	0
				8	0	0						8	0	1
				9	0	0						9	0	5
				10	1	3						10	1	0
			Add up	#	males	hermaphrodites	total	male/total		Add up	#	males	hermaphrodites	total	male/total
				1	8	92	100	0.08			1	9	67	76	0.118421
				2	14	100	114	0.122807			2	7	83	90	0.0777778
				3	5	64	69	0.0724638			3	4	69	73	0.0547945
				4	2	73	75	0.0266667			4	7	80	87	0.0804598
				5	3	121	124	0.0241935			5	4	77	81	0.0493827
				6	4	115	119	0.0336134			6	4	80	84	0.047619
				7	11	75	86	0.127907			7	7	75	82	0.0853659
				8	3	113	116	0.0258621			8	6	60	66	0.0909091
				9	0	111	111	0			9	2	90	92	0.0217391
				10	4	62	66	0.0606061			10	10	70	80	0.125
								0.057412							0.0751469

## Sheet: dsb-2 hatching
Genotype
	dsb-2					dsb-2;Ppie-1::him-5::GFP					dsb-2; Phim-5::him-5::GFP
Day 1
	#	egg	adult			#	egg	adult			#	egg	adult
	1	42	44	44		1	26	24	24		1	36	36	36
	2	32	19	19		2	30	31	30		2	23	25	23
	3	29	26	26		3	36	28	28		3	15	18	15
	4	37	33	33		4	27	28	27		4	16	15	15
	5	35	34	34		5	35	29	29		5	31	30	30
	6	30	29	29		6	22	15	15		6	33	32	32
	7	28	25	25		7	27	24	24		7	31	25	25
	8	32	33	33		8	38	34	34		8	40	38	38
	9	19	16	16		9	18	15	15		9	25	28	25
	10	36	38	38		10	21	19	19		10	9	15	9
	11	49	40	40		11	23	17	17		11	43	49	43
	12	39	30	30		12	30	32	30
	dsb-2					pie1;dsb-2					h5p;dsb-2
Day 2
	#	egg	adult			#	egg	adult			#	egg	adult
	1	105	66	66		1	85	46	46		1	104	69	69
	2	95	74	74		2	73	42	42		2	96	96	96
	3	76	56	56		3	87	48	48		3	97	85	85
	4	103	58	58		4	82	48	48		4	65	85	65
	5	98	49	49		5	60	29	29		5	80	80	80
	6	76	58	58		6	103	57	57		6	102	121	102
	7	102	53	53		7	77	36	36		7	90	101	90
	8	84	59	59		8	85	71	71		8	95	92	92
	9	90	76	76		9	103	58	58		9	83	100	83
	10	101	63	63		10	93	50	50		10	93	89	89
	11	124	42	42		11	77	43	43		11	116	74	74
	12	108	55	55		12	104	46	46
	dsb-2					pie1;dsb-2					h5p;dsb-2
Day 3
	#	egg	adult			#	egg	adult			#	egg	adult
	1	96	29	29		1	20	1	1		1	71	28	28
	2	129	19	19		2	44	8	8		2	75	46	46
	3	41	3	3		3	78	15	15		3	104	39	39
	4	98	25	25		4	66	11	11		4	75	65	65
	5	64	7	7		5	45	9	9		5	110	50	50
	6	84	9	9		6	52	6	6		6	96	50	50
	7	78	19	19		7	1	7	1		7	106	58	58
	8	128	25	25		8	58	13	13		8	77	27	27
	9	83	26	26		9	53	11	11		9	48	26	26
	10	26	1	1		10	59	5	5		10	120	51	51
	11	39	4	4		11	0	1	0		11	61	17	17
	12	91	11	11		12	23	4	4
	dsb-2					pie1;dsb-2					h5p;dsb-2
Day 4
	#	egg	adult			#	egg	adult			#	egg	adult
	1	2	0	0		1	0	1	0		1	4	4	4
	2	0	0	0		2	5	7	5		2	16	32	16
	3	1	1	1		3	0	1	0		3	10	19	10
	4	12	9	9		4	6	5	5		4	13	11	11
	5	0	0	0		5	2	15	2		5	1	1	1
	6	0	0	0		6	1	0	0		6	5	3	3
	7	3	4	3		7					7	10	9	9
	8	2	2	2		8	0	4	0		8	21	29	21
	9	3	2	2		9					9	8	13	8
	10	0	0	0		10	2	0	0		10	8	30	8
	11	3	1	1		11					11	0	0	0
	12	8	6	6		12
Add up
	#	egg		adult	hatched/egg	#	egg		adult	hatched/egg	#	egg		adult	hatched/egg
	1	245		139	0.567347	1	131		71	0.541985	1	215		137	0.637209
	2	256		112	0.4375	2	152		85	0.559211	2	210		181	0.861905
	3	147		86	0.585034	3	201		91	0.452736	3	226		149	0.659292
	4	250		125	0.5	4	181		91	0.502762	4	169		156	0.923077
	5	197		90	0.456853	5	142		69	0.485915	5	222		161	0.725225
	6	190		96	0.505263	6	178		78	0.438202	6	236		187	0.792373
	7	211		100	0.473934	7	105		61	0.580952	7	237		182	0.767932
	8	246		119	0.48374	8	181		118	0.651934	8	233		178	0.763948
	9	195		120	0.615385	9	174		84	0.482759	9	164		142	0.865854
	10	163		102	0.625767	10	175		74	0.422857	10	230		157	0.682609
	11	215		87	0.404651	11	100		60	0.6	11	220		134	0.609091
	12	246		102	0.414634	12	157		80	0.509554					0.753501
					0.505842					0.519072
