# Supplementary material for: Genetic and physical interactions reveal overlapping and distinct contributions to meiotic double-strand break formation in C. elegans
Source: eLife. 2026 Mar 25;13:RP96458. doi: 10.7554/eLife.96458 (PMC13016608; doi:10.7554/eLife.96458)
Supplement: Figure 3—figure supplement 1—source data 1. [file elife-96458-fig3-figsupp1-data1.xlsx]

## Sheet: All
	<5	5	6	7	8	9	10	11	12	>12
cep-1 (lg1205)	0	8.57143	91.4286	0	0	0	0	0	0	0
dsb-2 (me96)	0	0	36.8421	47.3684	0	0	10.5263	5.26316	0	0
him-5 (ok1896)	0	0	28.5714	71.4286	0	0	0	0	0	0
him-5 (e1490)	0	3.22581	22.5806	64.5161	0	0	0	0	0	0
him-17 (e2806)	0	0	51.2821	35.8974	12.8205	0	0	0	0	0
mre-11 (iow1)	0	40	5	10	15	20	10	0	0	0
parg-1 (gk120)	0	0	87.5	12.5	0	0	0	0	0	0
rec-1 (h2875)	0	7.40741	90.7407	1.85185	0	0	0	0	0	0
cep-1 (lg1205); dsb-2(me96)	0	0	17.8571	14.2857	23.2143	19.6429	10.7143	10.7143	3.57143	0
cep-1 (lg1205); mre-11 (iow)	0	60	0	20	0	0	0	20	0	0
cep-1 (lg1205); parg-1 (gk120)	0	0	79.0123	20.9877	0	0	0	0	0	0
cep-1 (lg1205); rec-1(h2875)	0	5	92.5	2.5	0	0	0	0	0	0
dsb-2 (me96); him-17 (e2806)	0	0	7.84314	5.88235	5.88235	19.6078	19.6078	15.6863	25.4902	0
dsb-2 (me96); mre-11 (iow1)	0	0	4.65116	11.6279	6.97674	6.97674	27.907	13.9535	25.5814	2.32558
dsb-2 (me96); parg-1 (gk120)	0	0	17.1429	21.4286	21.4286	24.2857	8.57143	7.14286	0	0
dsb-2 (me96); rec-1 (h2875)	0	7.40741	7.40741	22.2222	11.1111	18.5185	7.40741	11.1111	14.8148	0
him-5 (ok1896); parg-1 (gk120)	0	0	0	4	20	32	28	16	0	0
him-17 (e2806); parg-1 (gk120)	0	0	47.9452	17.8082	9.58904	13.6986	8.21918	2.73973	0	0
him-17 (e2806); rec-1 (h2875)	0	0	41.6667	35.4167	6.25	6.25	2.08333	6.25	2.08333	0
mre-11 (iow1); parg-1 (gk120)	0	0	0	7.69231	7.69231	7.69231	23.0769	23.0769	30.7692	0
mre-11 (iow1); rec-1 (h2875)	0	9.09091	0	9.09091	9.09091	18.1818	27.2727	9.09091	18.1818	0
rec-1 (h2875); parg-1 (gk120)	0	0	91.358	8.64198	0	0	0	0	0	0
him-5 (e1490); mre-11 (iow1)	0	0	0	4.7619	4.7619	14.2857	23.8095	38.0952	9.52381	0

## Sheet: him-5 (e1490)
n# of DAPI staining bodies	Day 1	%
<5	0	0
5	1	2.43902
6	10	24.3902
7	30	73.1707
8	0	0
9	0	0
10	0	0
11	0	0
12	0	0
>12	0	0
n	41

## Sheet: cep-1 (Ig1205)
n# of DAPI staining bodies	Day 1	%
<5	0	0
5	3	8.57143
6	32	91.4286
7	0	0
8	0	0
9	0	0
10	0	0
11	0	0
12	0	0
>12	0	0
n	35

## Sheet: dsb-2 (me96)
n# of DAPI staining bodies	Day 1
<5	0	0
5	0	0
6	22	48.8889
7	16	35.5556
8	2	4.44444
9	1	2.22222
10	3	6.66667
11	1	2.22222
12	0	0
>12	0	0
n	45

## Sheet: him-5 (ok1896)
n# of DAPI staining bodies	Day 1
<5	0	0
5	0	0
6	10	22.2222
7	35	77.7778
8	0	0
9	0	0
10	0	0
11	0	0
12	0	0
>12	0	0
n	45

## Sheet: him-17 (e2806)
n# of DAPI staining bodies	Day 1
<5	0	0
5	0	0
6	20	51.2821
7	14	35.8974
8	5	12.8205
9	0	0
10	0	0
11	0	0
12	0	0
>12	0	0
n	39

## Sheet: mre-11 (iow1)
n# of DAPI staining bodies	Day 1
<5	10	22.2222
5	12	26.6667
6	4	8.88889
7	4	8.88889
8	5	11.1111
9	6	13.3333
10	4	8.88889
11	0	0
12	0	0
>12	0	0
n	45

## Sheet: parg-1 (gk120)
n# of DAPI staining bodies	Day 1
<5	0	0
5	0	0
6	35	87.5
7	5	12.5
8	0	0
9	0	0
10	0	0
11	0	0
12	0	0
>12	0	0
n	40

## Sheet: rec-1 (h2875)
n# of DAPI staining bodies	Day 1
<5	0	0
5	4	7.40741
6	49	90.7407
7	1	1.85185
8	0	0
9	0	0
10	0	0
11	0	0
12	0	0
>12	0	0
n	54

## Sheet: cep-1 (Ig1205); dsb-2 (me96)
n# of DAPI staining bodies	Day 1
<5	0	0
5	0	0
6	10	17.8571
7	8	14.2857
8	13	23.2143
9	11	19.6429
10	6	10.7143
11	6	10.7143
12	2	3.57143
>12	0	0
n	56

[truncated: 14 more sheets: cep-1; mre-11 (iow1), cep-1 (Ig1205); parg-1 (gk120), rec-1 (h2875), cep-1 (lg1205), dsb-2 (me96); him-17 (e2806), dsb-2 (me96); mre-11 (iow1), dsb-2 (me96); parg-1 (gk120), rec-1 (h2875); dsb-2 (me96), parg-1 (gk120); him-5(ok1896), parg-1 (gk120); him-17 (e2806), rec-1 (h2875); him-17 (e2806), parg-1 (gk120); mre-11(iow1), rec-1 (h2875); mre-11 (iow1), rec-1 (h2875); parg-1 (gk120), him-5 (e1490); mre-11 (iow1)]
