# Supplementary material for: Genetic and physical interactions reveal overlapping and distinct contributions to meiotic double-strand break formation in C. elegans
Source: eLife. 2026 Mar 25;13:RP96458. doi: 10.7554/eLife.96458 (PMC13016608; doi:10.7554/eLife.96458)
Supplement: Figure 3—figure supplement 2—source data 1. [file elife-96458-fig3-figsupp2-data1.xlsx]

## Sheet: Sheet1
Worm	Phenotype
1.a	Univalents
2.a	Fusions
2.b	Fusions				Phenotype	% of Nuclei
3.a	Fusions				fusions	75
3.b	Fusions				6 DAPI bodies	4.16667
4.a	Univalents + Fusions				univalents	12.5
4.b	6				univalents + fusions	8.33333
5.a	Fusions
6.a	Fusions
7.a	Fusions
8.a	Fusions
8.b	Fusions
9.a	Fusions
9.b	Fusions
10.a	Fusions
10.b	Fusions
11.a	Univalents + Fusions
11.b	Univalents
12.a	Fusions
12.b	Fusions
13.a	Fusions
13.b	Fusions
14.a	Fusions
14.b	Univalents
