# Supplementary material for: Genetic and physical interactions reveal overlapping and distinct contributions to meiotic double-strand break formation in C. elegans
Source: eLife. 2026 Mar 25;13:RP96458. doi: 10.7554/eLife.96458 (PMC13016608; doi:10.7554/eLife.96458)
Supplement: Figure 3—figure supplement 3—source data 1. [file elife-96458-fig3-figsupp3-data1.xlsx]

## Sheet: dsb-2; parg-1 no IR
DI
Pic #	DAPI bodies -1
001a	8
001b	10
002a	7
002b	6
003a	8				6	7	8	9	10	11	12
003b	7				17.1429	21.4286	21.4286	24.2857	8.57143	7.14286	0	100
004a	9
004b	10
005a	7
005b	7
006a	7
006b	11
007a	6
007b	7
008a	6
008b	6
009a	8
009b	9
010a	7
010b	6
011a	8
011b	7
012a	8
012b	9
013a	6
013b	8
014b	9
016a	7
016b	7
017a	8
017b	9
018a	9
018b	8
019a	8
019b	9
020a	9
020b	9
021a	9
021b	7
022a	10
022b	7
023a	6
023b	7
025b	9
026a	9
026b	10
027a	11
027b	10
028a	6
028b	7
029a	9
029b	11
030a	8
030b	6
031a	6
032a	11
032b	11
033a	8
033b	8
034a	9
035a	8
035b	8
036a	10
036b	9
037a	6
037b	8
039a	9
039b	9
041a	6
041b	7

## Sheet: dsb-2; parg-1 10Gy
DAPI bodies			6	7	8	9	10	11	12
6			76.9231	11.5385	3.84615	1.92308	1.92308	3.84615	0	100
7
6
6
7
11
6
6
6
6
6
6
6
6
7
6
6
6
7
8
6
7
6
6
7
6
6
6
6
6
6
6
10
6
6
6
6
6
6
11
9
6
6
6
6
6
6
6
6
8
6
6

## Sheet: rec-1; him-17 no IR
DAPI bodies -1
7		6	7	8	9	10	11	12
8		41.6667	35.4167	6.25	6.25	2.08333	6.25	2.08333	100
6
8
6
7
8
6
7
6
7
7
11
7
6
6
6
10
7
7
7
9
6
9
6
6
6
6
6
9
7
6
11
6
6
7
7
6
7
7
12
7
6
6
7
6
7
11

## Sheet: rec-1; him-17 10 Gy
DAPI bodies
6		6	7	8	9	10	11	12
6		95.1807	3.61446	1.20482	0	0	0	0	100
6
7
6
6
6
6
6
6
6
6
6
6
6
7
6
6
6
6
6
6
6
6
6
6
6
6
7
6
6
6
6
6
6
6
6
6
6
6
6
6
6
6
6
6
6
6
6
6
6
6
6
6
6
8
6
6
6
6
6
6
6
6
6
6
6
6
6
6
6
6
6
6
6
6
6
6
6
6
6
6
6

## Sheet: rec-1; dsb-2 no IR
DAPI bodies		5	6	7	8	9	10	11	12
11		5	10	10	7.5	5	12.5	35	15	100
12
11
12
8
11
11
10
10
12
9
10
10
11
11
9
11
12
6
5
11
11
11
10
7
7
7
6
11
11
12
12
8
8
6
6
7
5
11
11

## Sheet: rec-1; dsb-2  10Gy
DAPI bodies			5	6	7	8	9	10	11	12
6			0	87.5	6.25	0	3.125	0	3.125	0	100
6
6
6
7
9
11
6
6
6
6
6
6
6
6
6
6
6
6
6
6
6
6
6
6
6
6
6
6
6
7
6

## Sheet: Sheet7
	5	6	7	8	9	10	11	12
dsb-2; parg-1 0Gy	0	17.1429	21.4286	21.4286	24.2857	8.57143	7.14286	0
dsb-2; parg-1 10Gy	0	76.9231	11.5385	3.84615	1.92308	1.92308	3.84615	0
dsb-2; rec-1 0Gy	5	10	10	7.5	5	12.5	35	15
dsb-2; rec-1 10Gy	0	87.5	6.25	0	3.125	0	3.125	0
rec-1; him-17 0Gy	0	41.6667	35.4167	6.25	6.25	2.08333	6.25	2.08333
rec-1; him-17 10Gy	0	95.1807	3.61446	1.20482	0	0	0	0
